# Supplementary material
Source: PubMed Central journal article supplement (PMC3466387)

**Supplementary Table S1.** Sample sources and collaborators

| Collaborator                 | Source <sup>a</sup> | European ancestry |              | African ancestry |              | Hispanic ancestry |            | Korean ancestry |              | Total        |              |               |
|------------------------------|---------------------|-------------------|--------------|------------------|--------------|-------------------|------------|-----------------|--------------|--------------|--------------|---------------|
|                              |                     | SLE               | Control      | SLE              | Control      | SLE               | Control    | SLE             | Control      | SLE          | Control      | Total         |
| <b>Discovery population</b>  |                     |                   |              |                  |              |                   |            |                 |              |              |              |               |
| Alarcón-Riquelme             | GENYO/OMRF          | 1,231             | 969          | 0                | 0            | 357               | 363        | 0               | 0            | 1,588        | 1,332        | 2,920         |
| Anaya                        | UDR                 | 0                 | 0            | 0                | 0            | 135               | 93         | 0               | 0            | 135          | 93           | 228           |
| Bae                          | HUHRD               | 0                 | 0            | 0                | 0            | 0                 | 0          | 640             | 740          | 640          | 740          | 1,380         |
| Boackle                      | UCDSM               | 14                | 0            | 7                | 0            | 13                | 0          | 0               | 0            | 34           | 0            | 34            |
| Criswell                     | UCSF                | 74                | 0            | 0                | 0            | 0                 | 0          | 0               | 0            | 74           | 0            | 74            |
| Freedman                     | WFU                 | 0                 | 0            | 0                | 475          | 0                 | 0          | 0               | 0            | 0            | 475          | 475           |
| Gaffney/Moser                | OMRF/UMN            | 445               | 0            | 0                | 0            | 0                 | 0          | 0               | 0            | 445          | 0            | 445           |
| Gilkeson/Kamen               | CLU/MUSC            | 73                | 174          | 263              | 187          | 0                 | 0          | 0               | 0            | 336          | 361          | 697           |
| Gregersen                    | FIMR                | 0                 | 0            | 0                | 317          | 0                 | 0          | 0               | 0            | 0            | 317          | 317           |
| Harley                       | OMRF/CCHMC          | 665               | 547          | 443              | 213          | 203               | 136        | 0               | 0            | 1,311        | 896          | 2,207         |
| Jacob                        | USC                 | 107               | 0            | 90               | 0            | 430               | 45         | 0               | 0            | 627          | 45           | 672           |
| James                        | OMRF                | 122               | 136          | 53               | 58           | 0                 | 5          | 0               | 0            | 175          | 199          | 374           |
| PROFILE group <sup>b</sup>   | UAB                 | 724               | 1,072        | 581              | 672          | 230               | 144        | 0               | 0            | 1,535        | 1,888        | 3,423         |
| Merrill                      | OMRF                | 78                | 2            | 28               | 5            | 0                 | 0          | 0               | 0            | 106          | 7            | 113           |
| Niewold                      | GKCLIR              | 79                | 0            | 139              | 0            | 0                 | 0          | 0               | 0            | 218          | 0            | 218           |
| Scofield                     | OMRF                | 30                | 63           | 2                | 0            | 3                 | 2          | 0               | 0            | 35           | 65           | 100           |
| Stevens                      | UW                  | 19                | 0            | 2                | 0            | 12                | 0          | 0               | 0            | 33           | 0            | 33            |
| Tsao                         | UCLA                | 30                | 0            | 71               | 7            | 109               | 19         | 0               | 0            | 210          | 26           | 236           |
| Vyse                         | ICL                 | 245               | 528          | 0                | 0            | 0                 | 0          | 0               | 0            | 245          | 528          | 773           |
| <b>Subtotal</b>              |                     | <b>3,936</b>      | <b>3,491</b> | <b>1,679</b>     | <b>1,934</b> | <b>1,492</b>      | <b>807</b> | <b>640</b>      | <b>740</b>   | <b>7,747</b> | <b>6,972</b> | <b>14,719</b> |
| <b>Validation population</b> |                     |                   |              |                  |              |                   |            |                 |              |              |              |               |
| Bae                          | HUHRD               | 0                 | 0            | 0                | 0            | 0                 | 0          | 268             | 397          | 268          | 397          | 665           |
| Kang                         | KNU                 | 0                 | 0            | 0                | 0            | 0                 | 0          | 150             | 347          | 150          | 347          | 497           |
| Kim                          | CNU                 | 0                 | 0            | 0                | 0            | 0                 | 0          | 0               | 453          | 0            | 453          | 453           |
| Lee                          | YU                  | 0                 | 0            | 0                | 0            | 0                 | 0          | 341             | 0            | 341          | 0            | 341           |
| Shim                         | EU                  | 0                 | 0            | 0                | 0            | 0                 | 0          | 145             | 307          | 145          | 307          | 452           |
| Suh                          | AU                  | 0                 | 0            | 0                | 0            | 0                 | 0          | 57              | 297          | 57           | 297          | 354           |
| <b>Subtotal</b>              |                     | <b>0</b>          | <b>0</b>     | <b>0</b>         | <b>0</b>     | <b>0</b>          | <b>0</b>   | <b>961</b>      | <b>1,801</b> | <b>961</b>   | <b>1,801</b> | <b>2,762</b>  |
| <b>Total</b>                 |                     | <b>3,936</b>      | <b>3,491</b> | <b>1,679</b>     | <b>1,934</b> | <b>1,492</b>      | <b>807</b> | <b>1,601</b>    | <b>2,541</b> | <b>8,708</b> | <b>8,773</b> | <b>17,481</b> |

<sup>a</sup>GENYO (Pfizer-University of Granada-Junta de Andalucía Centre for Genomics and Oncological Research, Granada, Spain), OMRF (Oklahoma Medical Research Foundation, Oklahoma City, Oklahoma, USA), UDR (Center for Autoimmune Diseases Research, Universidad del Rosario, Bogota, Colombia), HUHRD (Hanyang University Hospital for Rheumatic Diseases, Seoul, Republic of Korea), UCDSM (University of Colorado Denver School of Medicine, Aurora, Colorado, USA), UCSF (Rosalind Russell Medical Research Center for Arthritis, University of California, San Francisco, California, USA), WFU (Wake Forest University School of Medicine, Winston-Salem, North Carolina, USA), UMN (University of Minnesota, USA), CLU/MUSC (Carolina Lupus Cohort study & Medical University of South Carolina, Charleston, South Carolina, USA), FIMR (Feinstein Institute for Medical Research, Manhasset, New York, USA), CCHMC (Cincinnati Children's Hospital Medical Center, Cincinnati, Ohio, USA), USC (The Lupus Genetic Group, University of Southern California, Los Angeles, California, USA), UAB (University of Alabama at Birmingham, Birmingham, Alabama, USA), GKCLIR (Gwen Knapp Center for Lupus and Immunology Research, University of Chicago, Chicago, Illinois, USA), UW (University of Washington, Seattle Children's Hospital, Seattle, Washington, USA), UCLA (David Geffen School of Medicine, University of California, Los Angeles, California, USA), ICL (Imperial College London, Hammersmith Hospital, London, UK), KNU (Kyungpook National University School of Medicine, Daegu, Republic of Korea), CNU (Chungnam National University Hospital, Daejeon, Republic of Korea), YU (Yonsei University College of Medicine, Seoul, Republic of Korea), EU (Eulji University Hospital, Daejeon, Republic of Korea), AU (Ajou University School of Medicine, Suwon, Republic of Korea).

<sup>b</sup>The PROFILE group consists of Kimberly, Brown, Edberg, Petri, Ramsey-Goldman, Vila, and Reveille.

**Supplementary Table S2.** Tests of directly genotyped markers in *ICAM1-ICAM4-ICAM5* and *ITGAM* for association with SLE susceptibility

| Gene                            | SNP (allele, position) <sup>a</sup> |             | SLE patients  |               | Controls | Call rate               | HWE <i>P</i> <sup>b</sup> | Minor allele association |                                         | Meta-analysis <sup>c</sup> |                         |  |
|---------------------------------|-------------------------------------|-------------|---------------|---------------|----------|-------------------------|---------------------------|--------------------------|-----------------------------------------|----------------------------|-------------------------|--|
|                                 | ancestry                            |             | 11/12/22      | 11/12/22      | 11/12/22 |                         | OR (95% CI)               | <i>P</i>                 | <i>P</i> in Q ( <i>I</i> <sup>2</sup> ) | OR (95% CI)                | <i>P</i>                |  |
| <b><i>ICAM1-ICAM4-ICAM5</i></b> |                                     |             |               |               |          |                         |                           |                          |                                         |                            |                         |  |
| rs5030340<br>(G>A, 10243281)    | European                            |             | 3529/344/14   | 3056/348/11   | 98.3     | 0.737                   | 0.88 (0.76-1.02)          | 0.0826                   | 0.904 (0.00)                            | 0.86<br>(0.77-0.96)        | 9.71 x 10 <sup>-3</sup> |  |
|                                 | African                             |             | 1522/135/3    | 1697/178/3    | 97.9     | 0.622                   | 0.86 (0.69-1.08)          | 0.191                    |                                         |                            |                         |  |
|                                 | Hispanic                            |             | 1383/79/0     | 743/52/2      | 98.3     | 0.251                   | 0.76 (0.54-1.08)          | 0.126                    |                                         |                            |                         |  |
|                                 | Korean                              |             | 593/33/1      | 684/43/1      | 98.2     | 0.504                   | 0.90 (0.58-1.41)          | 0.646                    |                                         |                            |                         |  |
| rs5030390<br>(G>A, 10243537)    | European                            |             | 3387/497/18   | 2943/516/22   | 99.4     | 1.000                   | 0.84 (0.74-0.95)          | 4.92 x 10 <sup>-3</sup>  | 0.584 (0.00)                            | 0.82<br>(0.73-0.91)        | 2.80 x 10 <sup>-4</sup> |  |
|                                 | African                             |             | 1641/38/0     | 1877/55/0     | 99.9     | 1.000                   | 0.79 (0.52-1.20)          | 0.273                    |                                         |                            |                         |  |
|                                 | Hispanic                            |             | 1388/99/4     | 725/75/3      | 99.8     | 0.448                   | 0.70 (0.52-0.94)          | 0.0177                   |                                         |                            |                         |  |
|                                 | Korean                              |             | 639/0/1       | 739/1/0       | 100      | 1.000                   | 2.32 (0.21-25.56)         | 0.481                    |                                         |                            |                         |  |
| rs5030391<br>(G>A, 10243637)    | European                            |             | 3822/98/1     | 3384/93/1     | 99.6     | 0.478                   | 0.93 (0.70-1.24)          | 0.630                    | 0.563 (0.00)                            | 0.92<br>(0.72-1.18)        | 0.522                   |  |
|                                 | African                             |             | 1665/12/1     | 1920/14/0     | 100      | 1.000                   | 1.15 (0.55-2.42)          | 0.706                    |                                         |                            |                         |  |
|                                 | Hispanic                            |             | 1475/13/0     | 796/11/0      | 99.8     | 1.000                   | 0.64 (0.29-1.43)          | 0.272                    |                                         |                            |                         |  |
|                                 | Korean                              |             | 639/0/0       | 740/0/0       | 99.9     | 1.000                   | NC                        | NC                       |                                         |                            |                         |  |
| rs5030351<br>(G>A, 10246417)    | European                            |             | 3902/8/0      | 3440/7/0      | 99.1     | 1.000                   | 1.01 (0.37-2.78)          | 0.988                    | 0.418 (0.00)                            | 0.90<br>(0.80-1.00)        | 0.0510                  |  |
|                                 | African                             |             | 1034/556/67   | 1115/705/86   | 98.6     | 0.0606                  | 0.88 (0.79-0.99)          | 0.026                    |                                         |                            |                         |  |
|                                 | Hispanic                            |             | 1413/62/0     | 767/28/0      | 98.7     | 1.000                   | 1.20 (0.76-1.88)          | 0.432                    |                                         |                            |                         |  |
|                                 | Korean                              |             | 636/1/1       | 734/0/0       | 99.4     | 1.000                   | NC                        | 0.063                    |                                         |                            |                         |  |
| rs5491<br>(A>T, 10246540)       | European                            |             | 3906/15/0     | 3446/20/1     | 99.5     | 0.0329                  | 0.60 (0.31-1.16)          | 0.126                    | 0.639 (0.00)                            | 0.89<br>(0.81-0.98)        | 0.0236                  |  |
|                                 | African                             |             | 1031/563/73   | 1114/721/88   | 99.4     | 0.0354                  | 0.89 (0.79-0.99)          | 0.0370                   |                                         |                            |                         |  |
|                                 | Hispanic                            |             | 1424/55/0     | 771/32/0      | 99.3     | 1.000                   | 0.93 (0.60-1.45)          | 0.753                    |                                         |                            |                         |  |
|                                 | Korean                              |             | 543/91/4      | 623/113/3     | 99.8     | 0.615                   | 0.96 (0.73-1.27)          | 0.777                    |                                         |                            |                         |  |
| rs1799969<br>(G>A, 10255792)    | European                            |             | 3101/717/67   | 2761/640/41   | 98.7     | 0.585                   | 1.05 (0.95-1.17)          | 0.365                    | 0.289 (19.5)                            | 1.09<br>(1.00-1.19)        | 0.0468                  |  |
|                                 | African                             |             | 1613/63/2     | 1852/74/1     | 99.8     | 0.530                   | 1.01 (0.73-1.41)          | 0.941                    |                                         |                            |                         |  |
|                                 | Hispanic                            |             | 990/433/48    | 591/183/31    | 99.0     | 1.46 x 10 <sup>-3</sup> | 1.22 (1.04-1.44)          | 0.0176                   |                                         |                            |                         |  |
|                                 | Korean                              |             | 639/0/0       | 739/0/0       | 99.9     | 1.000                   | NC                        | NC                       |                                         |                            |                         |  |
| rs5498<br>(A>G, 10256683)       | European                            |             | 1123/1917/885 | 1079/1710/695 | 99.8     | 0.706                   | 1.11 (1.04-1.18)          | 2.50 x 10 <sup>-3</sup>  | 0.278 (22.0)                            | 1.13<br>(1.08-1.19)        | 6.05 x 10 <sup>-7</sup> |  |
|                                 | African                             |             | 1114/495/67   | 1325/550/59   | 99.9     | 0.812                   | 1.11 (0.98-1.25)          | 0.0989                   |                                         |                            |                         |  |
|                                 | Hispanic                            |             | 260/725/505   | 189/388/228   | 99.8     | 0.358                   | 1.26 (1.12-1.43)          | 1.58 x 10 <sup>-4</sup>  |                                         |                            |                         |  |
|                                 | Korean                              |             | 220/309/110   | 286/340/114   | 99.9     | 0.438                   | 1.13 (0.97-1.32)          | 0.107                    |                                         |                            |                         |  |
| rs5030400<br>(G>A, 10256796)    | European                            |             | 3849/54/1     | 3420/46/0     | 99.2     | 1.000                   | 1.08 (0.73-1.60)          | 0.695                    | 0.610 (0.00)                            | 1.11<br>(0.78-1.57)        | 0.579                   |  |
|                                 | African                             |             | 1674/3/0      | 1922/5/0      | 99.8     | 1.000                   | 0.69 (0.16-2.89)          | 0.608                    |                                         |                            |                         |  |
|                                 | Hispanic                            |             | 1465/15/0     | 796/5/0       | 99.2     | 1.000                   | 1.63 (0.59-4.48)          | 0.342                    |                                         |                            |                         |  |
|                                 | Korean                              |             | 635/0/1       | 736/0/0       | 99.4     | 1.000                   | NC                        | NC                       |                                         |                            |                         |  |
| rs3093032<br>(G>A, 10257336)    | European                            |             | 2914/933/87   | 2583/830/76   | 99.9     | 0.327                   | 1.00 (0.91-1.10)          | 0.996                    | 0.426 (0.00)                            | 0.96<br>(0.89-1.04)        | 0.344                   |  |
|                                 | African                             |             | 1608/69/2     | 1833/97/1     | 99.9     | 1.000                   | 0.84 (0.62-1.15)          | 0.279                    |                                         |                            |                         |  |
|                                 | Hispanic                            |             | 1288/196/8    | 681/120/6     | 100      | 0.813                   | 0.86 (0.68-1.08)          | 0.187                    |                                         |                            |                         |  |
|                                 | Korean                              |             | 593/47/0      | 676/62/1      | 99.9     | 1.000                   | 0.84 (0.57-1.24)          | 0.380                    |                                         |                            |                         |  |
| rs281437<br>(G>A, 10258238)     | European                            |             | 2078/1537/318 | 1767/1427/292 | 99.9     | 0.869                   | 0.94 (0.88-1.01)          | 0.100                    | 0.0386 (64.3)                           | 0.89<br>(0.84-0.94)        | 8.28 x 10 <sup>-6</sup> |  |
|                                 | African                             |             | 741/735/202   | 752/897/283   | 99.9     | 0.562                   | 0.84 (0.77-0.93)          | 5.34 x 10 <sup>-4</sup>  |                                         |                            |                         |  |
|                                 | Hispanic                            |             | 1022/415/54   | 490/279/38    | 100      | 0.918                   | 0.75 (0.65-0.88)          | 2.44 x 10 <sup>-4</sup>  |                                         |                            |                         |  |
|                                 | Korean                              |             | 530/108/2     | 610/122/7     | 99.9     | 0.662                   | 0.95 (0.73-1.23)          | 0.679                    |                                         |                            |                         |  |
| rs3093030<br>(G>A, 10258403)    | European                            |             | 1102/1894/876 | 1063/1691/669 | 98.2     | 0.972                   | 1.12 (1.05-1.20)          | 5.98 x 10 <sup>-4</sup>  | 0.307 (17.0)                            | 1.16<br>(1.10-1.22)        | 2.49 x 10 <sup>-8</sup> |  |
|                                 | African                             |             | 1353/292/33   | 1589/317/19   | 99.7     | 0.495                   | 1.18 (1.01-1.37)          | 0.0402                   |                                         |                            |                         |  |
|                                 | Hispanic                            |             | 267/712/503   | 192/379/221   | 98.9     | 0.255                   | 1.28 (1.13-1.45)          | 7.28 x 10 <sup>-5</sup>  |                                         |                            |                         |  |
|                                 | Korean (Pooled) <sup>d</sup>        |             | 655/714/195   | 1156/1084/249 | 97.9     | 0.826                   | 1.17 (1.07-1.29)          | 1.07.E-03                |                                         |                            |                         |  |
|                                 | Phase I                             |             | 268/285/84    | 339/322/79    | 99.8     | 0.867                   | 1.15 (0.98-1.35)          | 0.0841                   |                                         |                            |                         |  |
| Phase II                        |                                     | 387/429/111 | 817/762/170   | 96.9          | 0.691    | 1.18 (1.04-1.33)        | 7.45.E-03                 |                          |                                         |                            |                         |  |
| rs2228615<br>(G>A, 10264368)    | European                            |             | 1294/1893/725 | 1234/1674/561 | 99.4     | 0.888                   | 1.11 (1.04-1.18)          | 2.82 x 10 <sup>-3</sup>  | 0.369 (4.87)                            | 1.14<br>(1.08-1.20)        | 1.05 x 10 <sup>-6</sup> |  |
|                                 | African                             |             | 1374/271/28   | 1602/298/17   | 99.4     | 0.468                   | 1.14 (0.97-1.34)          | 0.103                    |                                         |                            |                         |  |
|                                 | Hispanic                            |             | 307/722/461   | 208/393/201   | 99.7     | 0.573                   | 1.25 (1.11-1.41)          | 2.87 x 10 <sup>-4</sup>  |                                         |                            |                         |  |
|                                 | Korean                              |             | 274/286/78    | 344/313/78    | 99.5     | 0.611                   | 1.13 (0.96-1.33)          | 0.129                    |                                         |                            |                         |  |
| <b><i>ITGAM</i></b>             |                                     |             |               |               |          |                         |                           |                          |                                         |                            |                         |  |
| rs1143679<br>(G>A, 31184312)    | European                            |             | 2551/1221/150 | 2649/781/48   | 99.6     | 0.282                   | 1.67 (1.52-1.83)          | 5.30.E-29                | 0.541 (0.00)                            | 1.67<br>(1.55-1.79)        | 3.32.E-46               |  |
|                                 | African                             |             | 1189/451/37   | 1543/366/18   | 99.8     | 0.543                   | 1.82 (1.51-2.20)          | 3.49.E-10                |                                         |                            |                         |  |
|                                 | Hispanic                            |             | 1026/429/36   | 652/147/7     | 99.9     | 0.845                   | 1.59 (1.39-1.83)          | 3.95.E-11                |                                         |                            |                         |  |
|                                 | Korean                              |             | 637/0/1       | 738/0/0       | 99.7     | 1.000                   | NC                        | NC                       |                                         |                            |                         |  |

HWE, Hardy-Weinberg equilibrium; OR, odds ratio; CI, confidence interval; Q, Cochran's Q statistic; NC, not calculated.

<sup>a</sup>The major allele (1) was more frequent than the minor allele (2) in the entire controls.

<sup>b</sup>HWE was examined in the controls.

<sup>c</sup>OR and *P* values of meta-analysis were calculated according to a fixed-effects model because *P* value of Q statistic was >0.01.

<sup>d</sup>A total of 4,142 Korean participants from the phase I (n = 1,377) and phase II (n = 2,762) were genotyped for rs3093030. The trans-ancestry meta-analysis was performed with the pooled Koreans (n = 4,142).

**Supplementary Table S3.** Pair-wise  $D'$  and  $r^2$  values among the 12 genotyped SNPs in the *ICAM1-ICAM4-ICAM5* locus

(a) European

| $D'$ ( $r^2$ ) | rs5030340   | rs5030390   | rs5030391   | rs5030351   | rs5491      | rs1799969   | rs5498      | rs5030400   | rs3093032   | rs281437    | rs3093030   | rs2228615 |
|----------------|-------------|-------------|-------------|-------------|-------------|-------------|-------------|-------------|-------------|-------------|-------------|-----------|
| rs5030340      |             |             |             |             |             |             |             |             |             |             |             |           |
| rs5030390      | 1.00 (0.01) |             |             |             |             |             |             |             |             |             |             |           |
| rs5030391      | 1.00 (0.00) | 1.00 (0.00) |             |             |             |             |             |             |             |             |             |           |
| rs5030351      | 1.00 (0.00) | 0.26 (0.00) | 0.27 (0.01) |             |             |             |             |             |             |             |             |           |
| rs5491         | 1.00 (0.00) | 0.08 (0.00) | 0.07 (0.00) | 1.00 (0.32) |             |             |             |             |             |             |             |           |
| rs1799969      | 1.00 (0.01) | 1.00 (0.01) | 1.00 (0.00) | 1.00 (0.00) | 1.00 (0.00) |             |             |             |             |             |             |           |
| rs5498         | 0.80 (0.03) | 0.84 (0.05) | 1.00 (0.01) | 1.00 (0.00) | 0.05 (0.00) | 0.99 (0.14) |             |             |             |             |             |           |
| rs5030400      | 0.81 (0.00) | 0.38 (0.00) | 1.00 (0.00) | 1.00 (0.00) | 1.00 (0.00) | 1.00 (0.00) | 1.00 (0.01) |             |             |             |             |           |
| rs3093032      | 1.00 (0.01) | 0.88 (0.01) | 0.99 (0.00) | 1.00 (0.00) | 0.59 (0.00) | 1.00 (0.02) | 1.00 (0.13) | 1.00 (0.04) |             |             |             |           |
| rs281437       | 0.67 (0.06) | 0.75 (0.12) | 0.84 (0.00) | 0.75 (0.00) | 0.11 (0.00) | 0.98 (0.05) | 0.99 (0.32) | 1.00 (0.02) | 0.98 (0.39) |             |             |           |
| rs3093030      | 0.79 (0.03) | 0.84 (0.05) | 1.00 (0.01) | 1.00 (0.00) | 1.00 (0.00) | 0.98 (0.14) | 0.97 (0.95) | 1.00 (0.01) | 0.98 (0.13) | 1.00 (0.33) |             |           |
| rs2228615      | 0.76 (0.02) | 0.83 (0.04) | 1.00 (0.01) | 1.00 (0.00) | 1.00 (0.00) | 0.97 (0.17) | 0.96 (0.78) | 1.00 (0.01) | 0.96 (0.10) | 0.99 (0.27) | 1.00 (0.83) |           |

(b) African

| $D'$ ( $r^2$ ) | rs5030340   | rs5030390   | rs5030391   | rs5030351   | rs5491      | rs1799969   | rs5498      | rs5030400   | rs3093032   | rs281437    | rs3093030   | rs2228615 |
|----------------|-------------|-------------|-------------|-------------|-------------|-------------|-------------|-------------|-------------|-------------|-------------|-----------|
| rs5030340      |             |             |             |             |             |             |             |             |             |             |             |           |
| rs5030390      | 0.08 (0.00) |             |             |             |             |             |             |             |             |             |             |           |
| rs5030391      | 1.00 (0.00) | 0.04 (0.00) |             |             |             |             |             |             |             |             |             |           |
| rs5030351      | 1.00 (0.02) | 1.00 (0.00) | 0.20 (0.00) |             |             |             |             |             |             |             |             |           |
| rs5491         | 1.00 (0.02) | 1.00 (0.00) | 0.51 (0.00) | 1.00 (0.98) |             |             |             |             |             |             |             |           |
| rs1799969      | 0.95 (0.00) | 0.02 (0.00) | 0.03 (0.00) | 1.00 (0.01) | 1.00 (0.01) |             |             |             |             |             |             |           |
| rs5498         | 0.85 (0.01) | 0.55 (0.00) | 0.97 (0.00) | 0.92 (0.05) | 0.92 (0.05) | 0.98 (0.09) |             |             |             |             |             |           |
| rs5030400      | 1.00 (0.00) | 1.00 (0.00) | 1.00 (0.00) | 1.00 (0.00) | 1.00 (0.00) | 1.00 (0.00) | 0.08 (0.00) |             |             |             |             |           |
| rs3093032      | 1.00 (0.00) | 1.00 (0.00) | 0.10 (0.00) | 1.00 (0.01) | 1.00 (0.01) | 0.03 (0.00) | 1.00 (0.01) | 0.58 (0.02) |             |             |             |           |
| rs281437       | 0.79 (0.05) | 0.69 (0.01) | 1.00 (0.00) | 0.18 (0.02) | 0.18 (0.02) | 0.88 (0.01) | 0.96 (0.12) | 0.56 (0.00) | 1.00 (0.04) |             |             |           |
| rs3093030      | 0.91 (0.00) | 0.01 (0.00) | 0.50 (0.00) | 0.91 (0.03) | 0.91 (0.03) | 0.98 (0.19) | 0.98 (0.47) | 1.00 (0.00) | 1.00 (0.00) | 1.00 (0.06) |             |           |
| rs2228615      | 0.79 (0.00) | 0.02 (0.00) | 1.00 (0.00) | 0.89 (0.02) | 0.89 (0.02) | 1.00 (0.21) | 0.96 (0.42) | 1.00 (0.00) | 1.00 (0.00) | 0.98 (0.06) | 0.99 (0.89) |           |

(c) Hispanic

| $D'$ ( $r^2$ ) | rs5030340   | rs5030390   | rs5030391   | rs5030351   | rs5491      | rs1799969   | rs5498      | rs5030400   | rs3093032   | rs281437    | rs3093030   | rs2228615 |
|----------------|-------------|-------------|-------------|-------------|-------------|-------------|-------------|-------------|-------------|-------------|-------------|-----------|
| rs5030340      |             |             |             |             |             |             |             |             |             |             |             |           |
| rs5030390      | 0.64 (0.00) |             |             |             |             |             |             |             |             |             |             |           |
| rs5030391      | 1.00 (0.00) | 1.00 (0.00) |             |             |             |             |             |             |             |             |             |           |
| rs5030351      | 1.00 (0.00) | 0.01 (0.00) | 1.00 (0.00) |             |             |             |             |             |             |             |             |           |
| rs5491         | 1.00 (0.00) | 0.81 (0.00) | 1.00 (0.00) | 0.89 (0.76) |             |             |             |             |             |             |             |           |
| rs1799969      | 1.00 (0.01) | 1.00 (0.01) | 1.00 (0.00) | 1.00 (0.00) | 0.97 (0.00) |             |             |             |             |             |             |           |
| rs5498         | 0.88 (0.03) | 0.74 (0.03) | 1.00 (0.01) | 0.73 (0.01) | 0.88 (0.02) | 1.00 (0.16) |             |             |             |             |             |           |
| rs5030400      | 1.00 (0.00) | 1.00 (0.00) | 1.00 (0.00) | 1.00 (0.00) | 1.00 (0.00) | 0.84 (0.00) | 1.00 (0.00) |             |             |             |             |           |
| rs3093032      | 1.00 (0.00) | 1.00 (0.01) | 0.02 (0.00) | 1.00 (0.00) | 0.97 (0.00) | 1.00 (0.02) | 1.00 (0.10) | 1.00 (0.04) |             |             |             |           |
| rs281437       | 0.69 (0.06) | 0.73 (0.10) | 1.00 (0.00) | 0.26 (0.00) | 0.25 (0.00) | 1.00 (0.05) | 0.99 (0.31) | 1.00 (0.01) | 1.00 (0.32) |             |             |           |
| rs3093030      | 0.87 (0.03) | 0.72 (0.03) | 1.00 (0.01) | 0.72 (0.01) | 1.00 (0.02) | 1.00 (0.17) | 0.98 (0.95) | 1.00 (0.00) | 1.00 (0.10) | 1.00 (0.30) |             |           |
| rs2228615      | 0.86 (0.03) | 0.70 (0.03) | 1.00 (0.01) | 0.70 (0.01) | 1.00 (0.02) | 1.00 (0.19) | 0.97 (0.84) | 1.00 (0.00) | 0.97 (0.08) | 0.99 (0.27) | 0.98 (0.87) |           |

(d) Korean<sup>a</sup>

| $D'$ ( $r^2$ ) | rs5030340   | rs5030390   | rs5030391 | rs5030351 | rs5491      | rs1799969 | rs5498      | rs5030400 | rs3093032   | rs281437    | rs3093030   | rs2228615 |
|----------------|-------------|-------------|-----------|-----------|-------------|-----------|-------------|-----------|-------------|-------------|-------------|-----------|
| rs5030340      |             |             |           |           |             |           |             |           |             |             |             |           |
| rs5030390      | 1.00 (0.00) |             |           |           |             |           |             |           |             |             |             |           |
| rs5030391      | NA          | NA          |           |           |             |           |             |           |             |             |             |           |
| rs5030351      | NA          | NA          | NA        |           |             |           |             |           |             |             |             |           |
| rs5491         | 0.07 (0.00) | 1.00 (0.00) | NA        | NA        |             |           |             |           |             |             |             |           |
| rs1799969      | NA          | NA          | NA        | NA        |             |           |             |           |             |             |             |           |
| rs5498         | 0.88 (0.02) | 1.00 (0.00) | NA        | NA        | 0.90 (0.11) | NA        |             |           |             |             |             |           |
| rs5030400      | NA          | NA          | NA        | NA        | NA          | NA        | NA          |           |             |             |             |           |
| rs3093032      | 1.00 (0.00) | 1.00 (0.00) | NA        | NA        | 1.00 (0.00) | NA        | 1.00 (0.03) | NA        |             |             |             |           |
| rs281437       | 0.11 (0.00) | 1.00 (0.01) | NA        | NA        | 1.00 (0.01) | NA        | 0.72 (0.03) | NA        | 1.00 (0.45) |             |             |           |
| rs3093030      | 0.21 (0.00) | 1.00 (0.00) | NA        | NA        | 1.00 (0.04) | NA        | 0.84 (0.54) | NA        | 1.00 (0.02) | 1.00 (0.05) |             |           |
| rs2228615      | 0.15 (0.00) | 1.00 (0.00) | NA        | NA        | 1.00 (0.04) | NA        | 0.80 (0.48) | NA        | 1.00 (0.02) | 1.00 (0.05) | 0.96 (0.90) |           |

<sup>a</sup>The minor alleles of the SNP (rs5030391, rs5030351, rs1799969, rs5030400) were not found in the Korean population, and the pair-wise LD values with those SNPs were not available (NA).

**Supplementary Table S4.** Summary of epistatic interactions between the seven SLE-associated SNPs in the *ICAM* locus and rs1143679 in *ITGAM*

| SNPs in the <i>ICAM1-ICAM5</i> locus (alleles) |          | SLE patients       |                    |                    | Controls           |                    |                    | Epistasis test <sup>a</sup> |       |           |        |
|------------------------------------------------|----------|--------------------|--------------------|--------------------|--------------------|--------------------|--------------------|-----------------------------|-------|-----------|--------|
| Ancestry                                       |          | GG in <i>ITGAM</i> | GA in <i>ITGAM</i> | AA in <i>ITGAM</i> | GG in <i>ITGAM</i> | GA in <i>ITGAM</i> | AA in <i>ITGAM</i> | Control-case                |       | Case-only |        |
|                                                |          | 11/12/22           | 11/12/22           | 11/12/22           | 11/12/22           | 11/12/22           | 11/12/22           | $\chi^2$                    | P     | $\chi^2$  | P      |
| rs3093030 (G>A)                                | European | 771/1218/538       | 211/372/177        | 760/1294/539       | 42/75/32           | 361/595/239        | 14/19/15           | 0.14                        | 0.708 | 0.22      | 0.636  |
|                                                | African  | 960/203/21         | 303/55/7           | 1256/266/215       | 31/5/1             | 371/74/4           | 14/4/0             | 0.68                        | 0.410 | 1.98      | 0.160  |
|                                                | Hispanic | 208/509/294        | 27/71/49           | 138/295/215        | 4/11/20            | 82/199/143         | 0/5/2              | 0.74                        | 0.389 | 3.18      | 0.0744 |
| rs2569693 (C>T)                                | European | 876/1224/451       | 260/369/152        | 895/1304/450       | 58/65/27           | 430/591/200        | 14/24/10           | 1.32                        | 0.251 | 0.07      | 0.793  |
|                                                | African  | 977/194/18         | 311/48/7           | 1283/244/0         | 31/5/1             | 381/67/3           | 14/4/0             | 1.37                        | 0.243 | 3.73      | 0.0535 |
|                                                | Hispanic | 231/539/256        | 30/67/50           | 158/300/194        | 4/14/18            | 98/195/136         | 0/5/2              | 1.29                        | 0.257 | 1.58      | 0.209  |
| rs5498 (A>G)                                   | European | 783/1218/546       | 210/379/188        | 771/1319/553       | 44/73/33           | 374/604/240        | 13/20/15           | 0.00                        | 1.000 | 0.14      | 0.713  |
|                                                | African  | 802/342/45         | 251/103/11         | 1032/450/1053      | 26/10/1            | 313/129/9          | 11/6/1             | 0.23                        | 0.633 | 0.73      | 0.395  |
|                                                | Hispanic | 204/524/296        | 28/71/48           | 135/295/221        | 3/12/21            | 79/205/144         | 0/5/2              | 0.30                        | 0.582 | 2.45      | 0.118  |
| rs2228615 (G>A)                                | European | 872/1223/450       | 256/367/151        | 891/1290/445       | 57/65/27           | 427/588/198        | 14/24/10           | 0.99                        | 0.320 | 0.04      | 0.846  |
|                                                | African  | 965/194/18         | 310/48/7           | 1274/248/0         | 31/5/1             | 376/68/3           | 14/4/0             | 1.22                        | 0.269 | 3.42      | 0.0645 |
|                                                | Hispanic | 229/536/259        | 30/66/49           | 156/298/197        | 4/14/18            | 96/195/136         | 0/5/2              | 1.78                        | 0.182 | 1.69      | 0.194  |
| rs2569702 (T>C)                                | European | 869/1222/460       | 258/363/160        | 886/1301/462       | 58/64/28           | 427/587/207        | 13/25/10           | 0.95                        | 0.330 | 0.05      | 0.815  |
|                                                | African  | 977/194/18         | 311/48/7           | 1283/244/0         | 31/5/1             | 381/67/3           | 14/4/0             | 1.37                        | 0.243 | 3.73      | 0.0535 |
|                                                | Hispanic | 230/537/259        | 30/67/50           | 157/298/197        | 4/14/18            | 97/196/136         | 0/5/2              | 1.62                        | 0.203 | 1.59      | 0.208  |
| rs892188 (C>T)                                 | European | 869/1222/460       | 258/363/160        | 886/1301/462       | 58/64/28           | 427/587/207        | 13/25/10           | 0.95                        | 0.330 | 0.05      | 0.815  |
|                                                | African  | 977/194/18         | 311/48/7           | 1283/244/1283      | 31/5/1             | 381/67/3           | 14/4/0             | 1.37                        | 0.243 | 3.73      | 0.0535 |
|                                                | Hispanic | 230/537/259        | 30/67/50           | 157/298/197        | 4/14/18            | 97/196/136         | 0/5/2              | 1.62                        | 0.203 | 1.59      | 0.208  |
| rs281437 (G>A)                                 | European | 1292/1048/211      | 432/283/65         | 1360/1061/225      | 90/47/13           | 628/501/90         | 29/12/6            | 0.00                        | 0.957 | 0.24      | 0.626  |
|                                                | African  | 516/526/146        | 148/172/45         | 631/696/1032       | 20/11/6            | 167/217/67         | 7/7/4              | 0.04                        | 0.833 | 2.94      | 0.0863 |
|                                                | Hispanic | 671/324/31         | 106/34/7           | 420/197/34         | 29/6/1             | 279/131/19         | 5/2/0              | 0.54                        | 0.462 | 1.74      | 0.187  |

<sup>a</sup>Epistatic interaction between the *ITGAM* SNP and an *ICAM* SNP was examined among cases and controls using the PLINK '--epistasis' analysis and among cases only using the PLINK '--fast-epistasis' analysis.

**Supplementary Figure S1.** The results of principal component analyses for both SLE patients and controls of European (A), African (B), Hispanic (C), and Korean (D) ancestries are plotted according to the principal components 1 (PC1) and 2 (PC2), after removal of outliers.

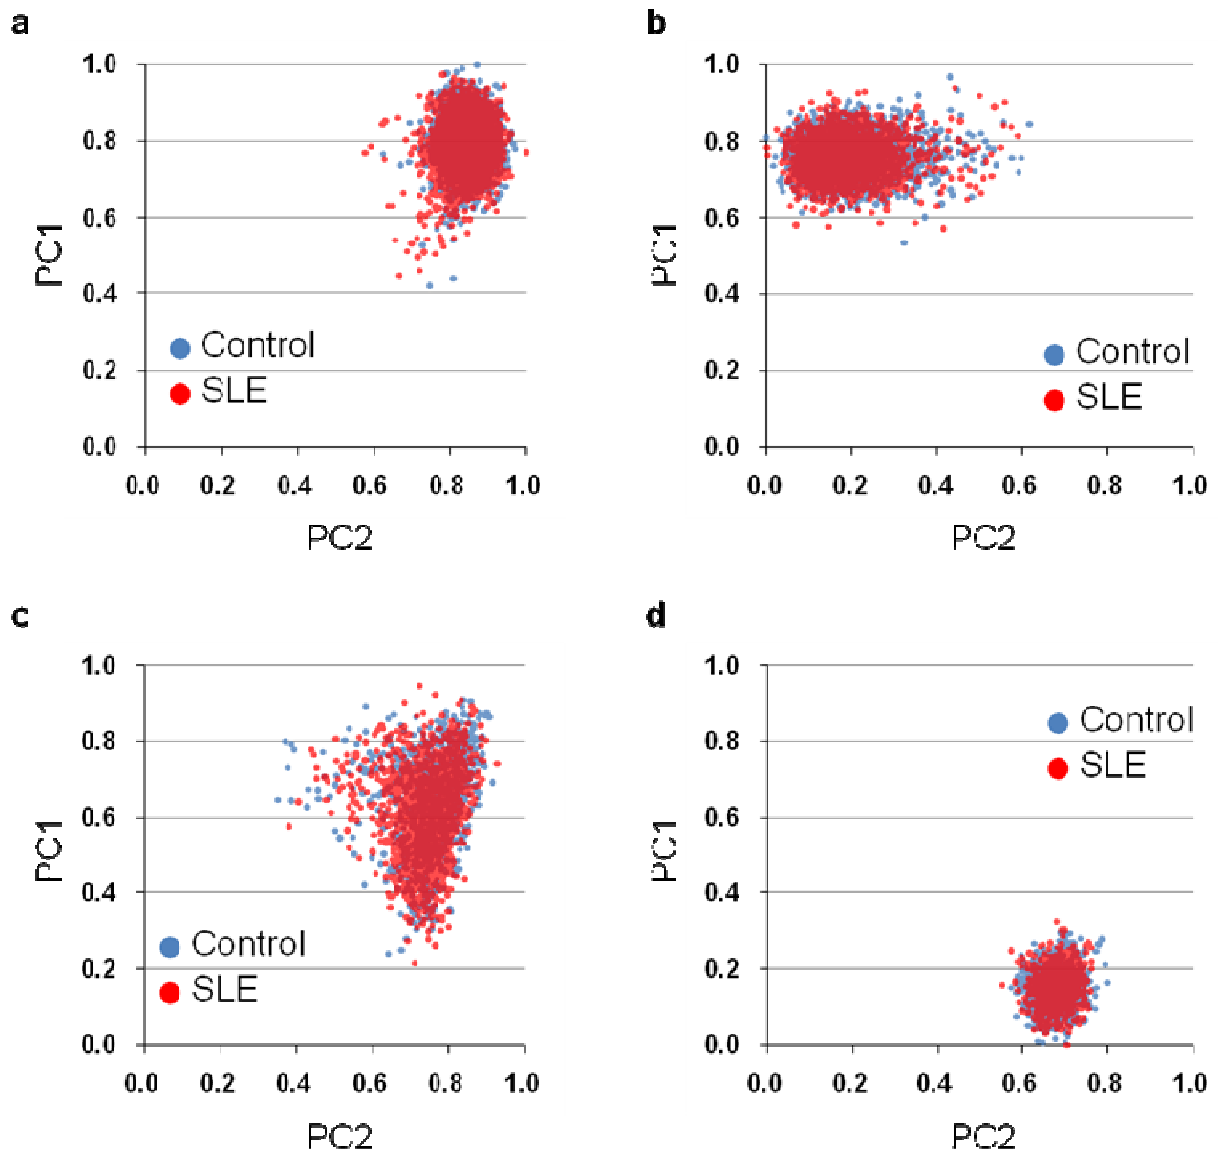

**Supplementary Figure S2.** Analysis for the correlation between expression levels of *ICAM1* (a), *ICAM4* (b, c, and d), and *ICAM5* (e) and 19 SNPs located in the vicinity of the genes. ILMN\_number is the probe identifier of the illumina human WG-6 v3 platform (ILMN\_1812226 for *ICAM1*; ILMN\_1681296, ILMN\_1734660, and ILMN\_2393067 for *ICAM4*; and ILMN\_1802524 for *ICAM5*). The X-axis indicates the SNP positions on the chromosome 19 and the Y-axis indicates  $-\log_{10}(P\text{-value})$  for the SNP association with mRNA levels.

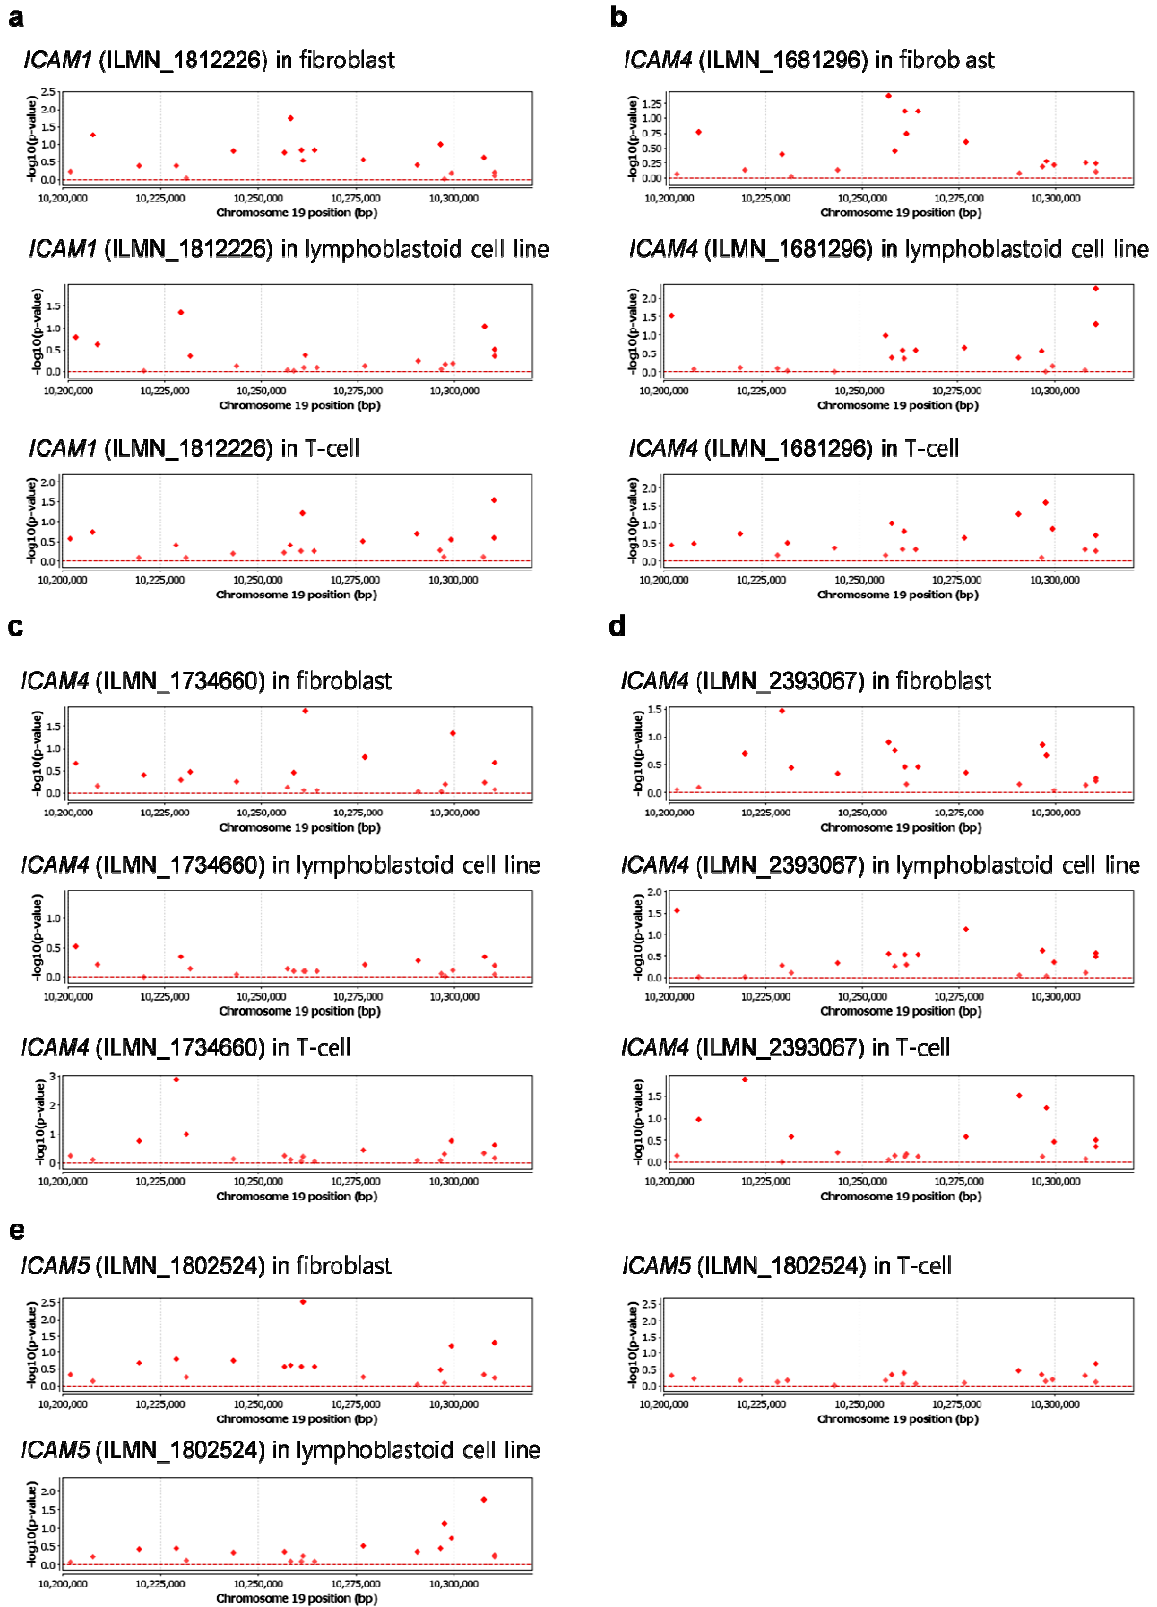

Supplement: NIHMS387584-supplement-ICAM_SuppData.pdf [file NIHMS387584-supplement-ICAM_SuppData.pdf]
